# Supplementary material for: Vitamin D confers neuroprotective effects in traumatic brain injury by activating Nrf2 signaling through an autophagy-mediated mechanism
Source: Research Square preprint supplement (doi:10.21203/rs.3.rs-362065/v2), 2021-07-13
Supplement: Supplementary file 1 [file 36939cfee0f1c1001b9ae5ab.docx]

**Supplementary Table 2** Primer sequences used for the qPCR analysis

| Gene | Sense Primer (5’-3’) | Antisense Primer (5’-3’) length (bp) |
| --- | --- | --- |
| LC3  P62  Beclin 1  NQO-1  GCLC  HO-1 | CGTCACCCAGGCGAGTTACC  GGAGGAGACGATGACTGG  AGATTGGACCAGGAGGAA  TACGATCCTCCCTCAACA  TGGCAGACAATGAGGTTT  GGCAGAGGGTGATAGAAGAGG | GAGATGCGTCTGCGGTTCG 114  TCTGTAGGAGCCTGGTGAG 145  AGGTGGCATTGAAGACAT 160  TACAGCAGCCTCCTTCAT 108  ACAGCGGAATGAGGAAGT 175  AGCTCCTGCAACTCCTCAAA 182 |
| β-actin | CATCCTGCGTCTGGACCTGG | TAATGTCACGCACGATTTCC 116 |
